# Supplementary material
Source: Springer Nature journal article supplement (https://www.springermedizin.de/resource/supplementary/12974_2011_493_MOESM4_ESM.pdf/9601346)

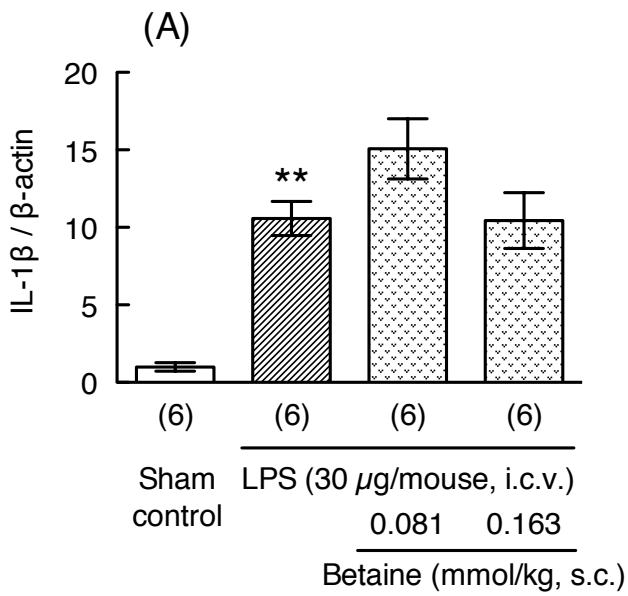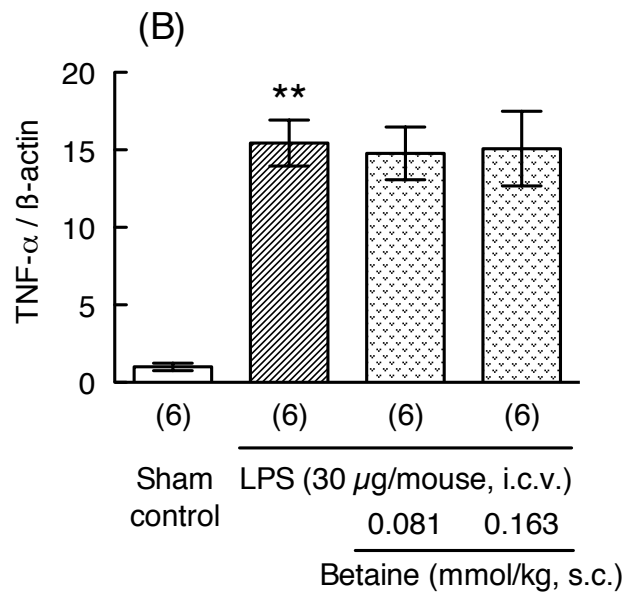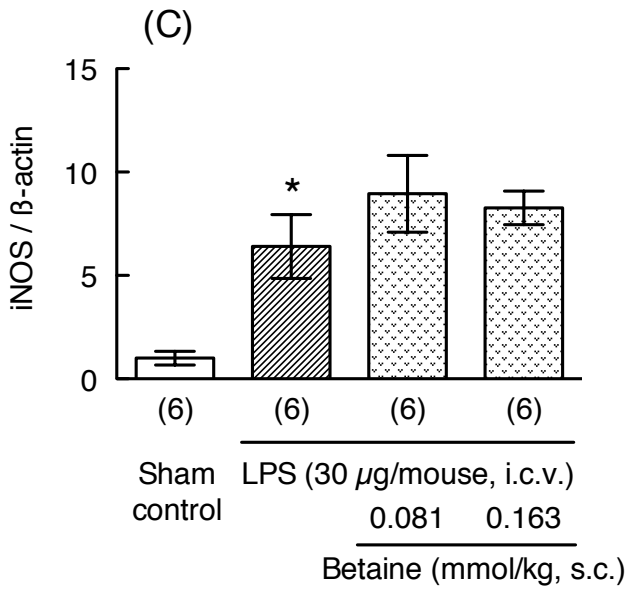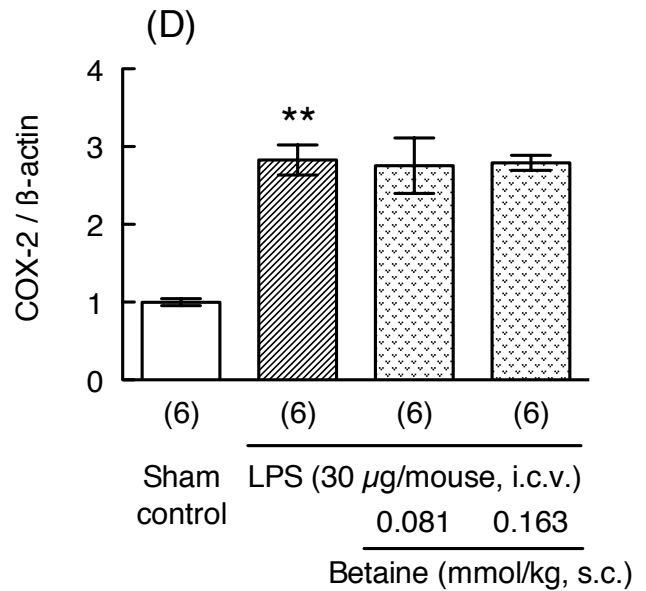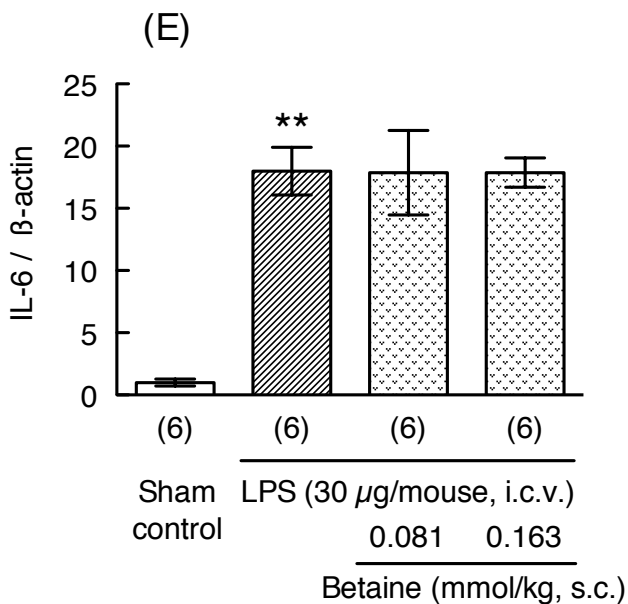

Supplement: MOESM4 [file 9601346]
